# Supplementary material
Source: PubMed Central journal article supplement (PMC3060371)
Supplement: tjp0589-0939-SD1.pdf [file tjp0589-0939-SD1.pdf]

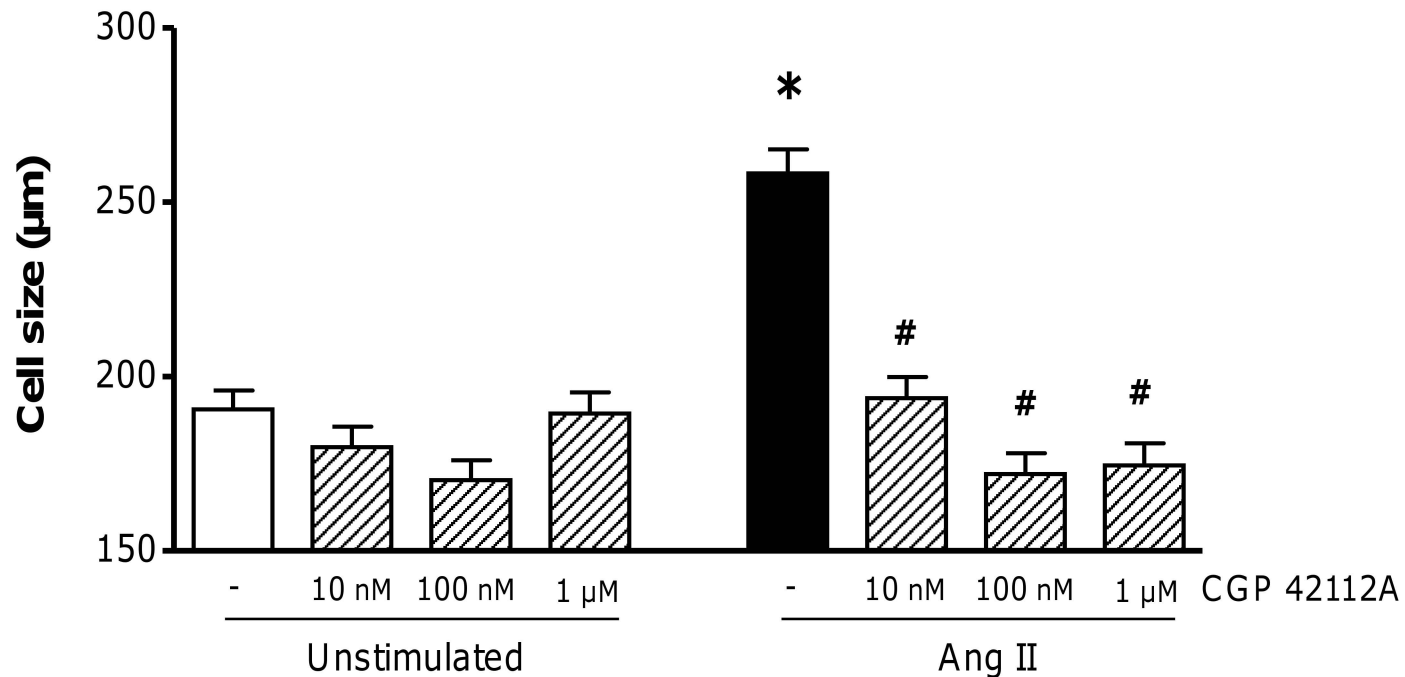

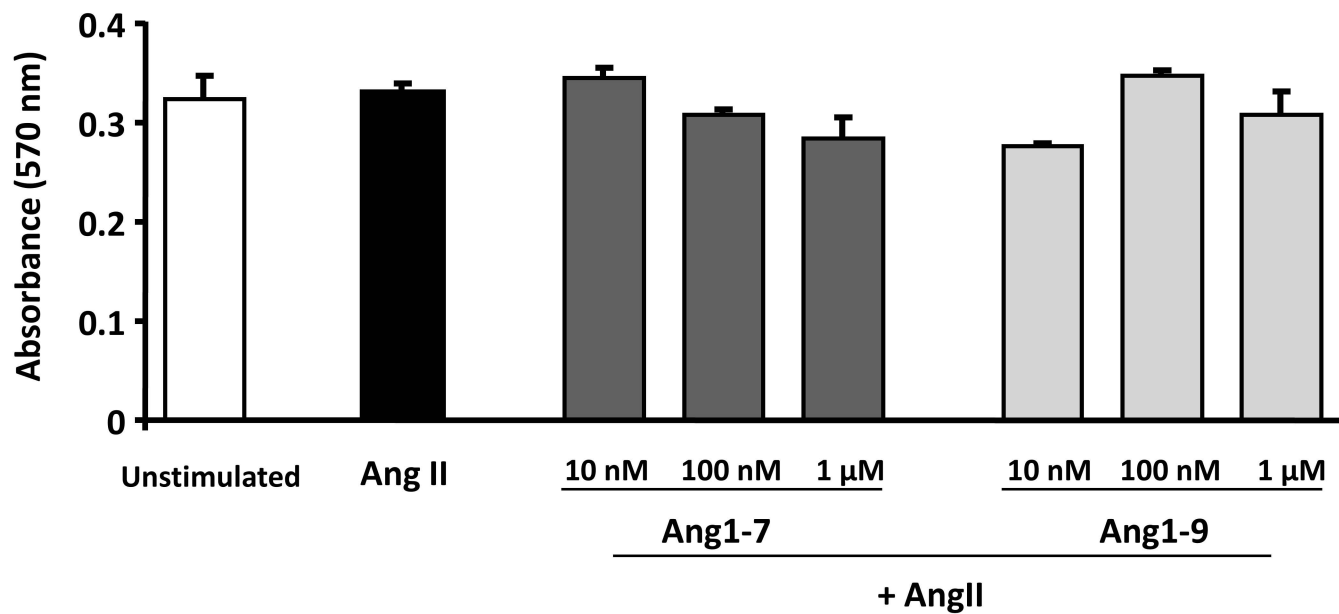

**Figure S1 Effect of AT<sub>2</sub>R agonism on cardiomyocyte hypertrophy.** H9c2 cardiomyocytes were incubated for 24 h in serum-free media before addition of the specific AT<sub>2</sub>R agonist CGP42112A at 10 nM, 100 nM or 1  $\mu$ M for 30 minutes followed by addition of 100 nM AngII. Cells were incubated for a further 96 h, fixed, stained with crystal violet and cell size measured using ImageProPlus. \* $p < 0.001$  vs non-stimulated cells; # $p < 0.001$  vs AngII-stimulated cells.

**Figure S2. The effect of AngII, Ang1-7 and Ang1-9 on cardiomyocyte viability.** H9c2 cardiomyocytes were incubated with 10 nM, 100 nM or 1  $\mu$ M Ang1-7 or Ang1-9 30 minutes prior to stimulation with AngII. After incubation for 96 hours, cardiomyocyte viability was assessed using the MTT assay, before absorbance was recorded at 570 nm.
